# Supplementary material for: Safety reporting in neonatal clinical trials: reflections towards optimal, globally relevant approaches
Source: Springer Nature journal article supplement (doi:10.1186/s13063-025-08723-y), 2025-02-09
Supplement: MOESM1 [file 13063_2025_8723_MOESM1_ESM.pdf]

## Supplementary Material 1: Globally Relevant Neonatal Adverse Event Grading Tool

Adapted from the NAESS and neonatal DAIDS adverse event grading tool

(Salaets T, *et al.* Arch Dis Child. 2019; 104:1167-73; IMPAACT (<https://www.impaactnetwork.org/studies/p1106>))

### GLOBALLY RELEVANT NEONATAL ADVERSE EVENT GRADING TOOL

**Purpose of this document:** to standardise the classification and severity of adverse events across diverse income settings.

In general, and where appropriate, the parameters refer to the associated neonatal conditions e.g., “apnoea” is “neonatal apnoea”; “Respiratory Distress Syndrome” is “Neonatal Respiratory Distress Syndrome”, etc.

The requirement for an intervention does not mean that the intervention has to be available e.g., requiring urgent blood transfusion would be the need for an urgent blood transfusion whether the blood was available or not.

| Parameter                                                                                                                                                                                                   | Grade 0<br>Normal                | Grade 1<br>Mild                                                                                                                                                                                                                                                                         | Grade 2<br>Moderate                                                                                                                                                                                                                                               | Grade 3<br>Severe                                                                                                                                                                                                                                                                                                                 | Grade 4<br>Potentially Life-Threatening                                                                                                                                                                                                                                                                                          | Grade 5 |
|-------------------------------------------------------------------------------------------------------------------------------------------------------------------------------------------------------------|----------------------------------|-----------------------------------------------------------------------------------------------------------------------------------------------------------------------------------------------------------------------------------------------------------------------------------------|-------------------------------------------------------------------------------------------------------------------------------------------------------------------------------------------------------------------------------------------------------------------|-----------------------------------------------------------------------------------------------------------------------------------------------------------------------------------------------------------------------------------------------------------------------------------------------------------------------------------|----------------------------------------------------------------------------------------------------------------------------------------------------------------------------------------------------------------------------------------------------------------------------------------------------------------------------------|---------|
| <b>RESPIRATORY</b>                                                                                                                                                                                          |                                  |                                                                                                                                                                                                                                                                                         |                                                                                                                                                                                                                                                                   |                                                                                                                                                                                                                                                                                                                                   |                                                                                                                                                                                                                                                                                                                                  |         |
| Apnoea                                                                                                                                                                                                      | No apnoeas                       | Self-limiting apnoea                                                                                                                                                                                                                                                                    | Apnoea responsive to stimulation<br><b>AND/OR</b><br>temporary FiO <sub>2</sub> increase                                                                                                                                                                          | Apnoea requiring sustained FiO <sub>2</sub> increase<br><b>AND/OR</b><br>requiring non-invasive ventilation<br><b>AND/OR</b><br>other major care changes required                                                                                                                                                                 | Apnoea with life-threatening respiratory <b>and/or</b> haemodynamic compromise<br><b>AND/OR</b><br>urgent care change required                                                                                                                                                                                                   | Death   |
| Bronchopulmonary Dysplasia                                                                                                                                                                                  | No evidence of BPD by definition | Supplemental oxygen at 28 days<br><b>AND</b><br>breathing room air<br>at 36 weeks postmenstrual age (PMA) in infants born at <32 weeks' gestation<br><b>OR</b><br>by 56 days postnatal age (PNA) in infants born at >32 weeks gestation<br><b>OR</b><br>breathing room air at discharge | Supplemental oxygen at 28 days<br><b>AND</b><br>need for up to 30% oxygen<br>at 36 weeks PMA in infants born at <32 weeks' gestation<br><b>OR</b><br>by 56 days PNA in infants born at >32 weeks gestation<br><b>OR</b><br>need for up to 30% oxygen at discharge | Supplemental oxygen at 28 days<br><b>AND</b><br>need for >30% oxygen <b>OR</b><br>positive pressure ventilation<br>at 36 weeks PMA in infants born at <32 weeks' gestation<br><b>OR</b><br>by 56 days PNA in infants born at >32 weeks gestation<br><b>OR</b><br>need for >30% oxygen <b>OR</b><br>positive pressure at discharge | Supplemental oxygen at 28 days<br><b>AND</b><br>need for >30% oxygen <b>AND</b><br>positive pressure ventilation<br>at 36 weeks PMA in infants born at <32 weeks' gestation<br><b>OR</b><br>by 56 days PNA in infants born at >32 weeks gestation<br><b>OR</b><br>need for >30% oxygen <b>AND</b> positive pressure at discharge | Death   |
| For conversion of oxygen administered by different modalities to FiO <sub>2</sub> : see for example <a href="http://nicutools.org/MediCalcs/ActualO2.php3">http://nicutools.org/MediCalcs/ActualO2.php3</a> |                                  |                                                                                                                                                                                                                                                                                         |                                                                                                                                                                                                                                                                   |                                                                                                                                                                                                                                                                                                                                   |                                                                                                                                                                                                                                                                                                                                  |         |

| Parameter                                               | Grade 0<br>Normal                    | Grade 1<br>Mild                                                                                                                                     | Grade 2<br>Moderate                                                                                                                                               | Grade 3<br>Severe                                                                                                                                             | Grade 4<br>Potentially Life-Threatening                                                                                                                                      | Grade 5 |
|---------------------------------------------------------|--------------------------------------|-----------------------------------------------------------------------------------------------------------------------------------------------------|-------------------------------------------------------------------------------------------------------------------------------------------------------------------|---------------------------------------------------------------------------------------------------------------------------------------------------------------|------------------------------------------------------------------------------------------------------------------------------------------------------------------------------|---------|
| Persistent Pulmonary Hypertension of the Newborn (PPHN) | No signs of PPHN                     | Evidence of PPHN with no clinical symptoms                                                                                                          | Evidence of PPHN with moderate clinical symptoms<br><b>AND/OR</b><br>an oxygenation index <25<br><b>AND/OR</b><br>minor care changes required                     | Evidence of PPHN with severe clinical symptoms<br><b>AND/OR</b><br>an oxygenation index ≥25 and <40<br><b>AND/OR</b><br>major care changes required           | Evidence of PPHN with life threatening respiratory <b>and/or</b> hemodynamic compromise<br><b>AND/OR</b><br>oxygenation index >40<br><b>AND/OR</b><br>ECMO required          | Death   |
| Pneumothorax                                            | No evidence of pneumothorax          | Evidence of pneumothorax with no clinical signs<br><b>AND</b><br>no care change required                                                            | Evidence of pneumothorax with minor clinical signs<br><b>AND/OR</b><br>minor care changes required                                                                | Evidence of pneumothorax with significant clinical signs<br><b>AND/OR</b><br>major care change                                                                | Evidence of pneumothorax with life-threatening respiratory <b>and/or</b> haemodynamic compromise<br><b>AND/OR</b><br>urgent major care change required                       | Death   |
| Pulmonary Haemorrhage                                   | No evidence of pulmonary haemorrhage | Evidence of pulmonary haemorrhage with no care change required                                                                                      | Evidence of pulmonary haemorrhage without relevant increase in pCO <sub>2</sub> <b>or</b> decrease in oxygenation<br><b>AND/OR</b><br>minor care changes required | Evidence of pulmonary haemorrhage with relevant increase in pCO <sub>2</sub> <b>or</b> decrease in oxygenation<br><b>AND/OR</b><br>major care change required | Evidence of pulmonary haemorrhage with life-threatening respiratory <b>and/or</b> hemodynamic compromise                                                                     | Death   |
| Respiratory Distress Syndrome (RDS)/Insufficiency       | No evidence of respiratory distress  | Clinical evidence of mildly increased respiratory distress with no apparent change in baseline functioning<br><b>AND</b><br>no care change required | Clinical evidence of increased respiratory distress with minor care changes required                                                                              | Clinical evidence of increased respiratory distress with relevant deterioration in gas exchange<br><b>AND/OR</b><br>major care changes required               | Clinical evidence of increased respiratory distress with life-threatening respiratory <b>and/or</b> haemodynamic compromise<br><b>AND/OR</b><br>urgent care changes required | Death   |
| <b>CARDIOVASCULAR</b>                                   |                                      |                                                                                                                                                     |                                                                                                                                                                   |                                                                                                                                                               |                                                                                                                                                                              |         |
| Coagulation disorder                                    | No coagulation abnormality           | Minor biochemical coagulation abnormalities without clinical signs<br><b>AND</b><br>no care change required                                         | Biochemical <b>or</b> clinical coagulation abnormalities with clinical signs<br><b>AND/OR</b><br>increased monitoring required                                    | Biochemical <b>or</b> clinical coagulation abnormalities<br><b>AND</b><br>intervention required                                                               | Biochemical <b>or</b> clinical coagulation abnormalities with life threatening consequences<br><b>AND/OR</b><br>urgent major care changes required                           | Death   |
| Congenital Heart Disease                                | No congenital heart disease          | Minor congenital heart disease<br><b>AND</b><br>no treatment required                                                                               | Minor congenital heart disease<br><b>AND</b><br>future treatment may be required                                                                                  | Major congenital heart disease<br><b>AND</b><br>no immediate treatment required                                                                               | Major congenital heart disease<br><b>AND</b><br>immediate treatment required                                                                                                 | Death   |
| Hypertension                                            | No blood pressure (BP) performed     | Self-limiting hypertension<br><b>AND</b><br>no care change required                                                                                 | Persistent hypertension<br><b>AND</b><br>no care change required                                                                                                  | Persistent hypertension<br><b>AND</b><br>need for antihypertensive medication                                                                                 | Persistent hypertension with life-threatening consequences                                                                                                                   | Death   |

| Parameter                          | Grade 0<br>Normal                  | Grade 1<br>Mild                                                                                                 | Grade 2<br>Moderate                                                                                                                                             | Grade 3<br>Severe                                                                                                                      | Grade 4<br>Potentially Life-Threatening                                                                                               | Grade 5 |
|------------------------------------|------------------------------------|-----------------------------------------------------------------------------------------------------------------|-----------------------------------------------------------------------------------------------------------------------------------------------------------------|----------------------------------------------------------------------------------------------------------------------------------------|---------------------------------------------------------------------------------------------------------------------------------------|---------|
| Hypotension                        | No BP performed                    | Hypotension with<br>no effect on perfusion<br><b>AND</b><br>no care change required                             | Persistent hypotension with<br>no effect on perfusion<br><b>AND/OR</b><br>minor care changes required                                                           | Persistent hypotension affecting<br>perfusion<br><b>AND/OR</b><br>major care changes required                                          | Hypotension<br>with life-threatening consequences<br><b>AND/OR</b><br>urgent care changes required                                    | Death   |
| Oedema                             | No oedema                          | Mild oedema<br><b>AND</b><br>no care change required                                                            | Moderate oedema<br><b>AND/OR</b><br>minor care changes required                                                                                                 | Severe oedema<br><b>AND/OR</b><br>major care change required                                                                           | Severe oedema<br>with life threatening consequences<br><b>AND/OR</b><br>urgent major care changes required                            | Death   |
| Patent Ductus Arteriosus<br>(PDA)  | No evidence of PDA                 | Diagnosis of PDA<br><b>AND</b><br>no care change required                                                       | PDA<br><b>AND</b><br>minor care changes required                                                                                                                | Diagnosis of PDA<br><b>AND</b><br>major care changes required                                                                          | Diagnosis of PDA<br><b>AND</b><br>surgical ligation required                                                                          | Death   |
| Tachycardia                        | No tachycardia                     | Self-limiting episodes of<br>tachycardia<br><b>AND</b><br>asymptomatic<br><b>AND</b><br>no care change required | Persistent tachycardia<br><b>AND</b><br>minor care changes required                                                                                             | Persistent tachycardia resulting in<br>non-life-threatening haemodynamic<br>compromise<br><b>AND/OR</b><br>major care changes required | Persistent tachycardia resulting in<br>life-threatening consequences<br><b>AND/OR</b><br>urgent major care changes required           | Death   |
| Bradycardia                        | No bradycardia                     | Self-limiting episodes of<br>bradycardia<br><b>AND</b><br>no care change required                               | Persistent bradycardia<br><b>AND</b><br>minor care changes required                                                                                             | Persistent bradycardia resulting in<br>non-life-threatening haemodynamic<br>compromise<br><b>AND/OR</b><br>major care changes required | Persistent bradycardia resulting in<br>life-threatening consequences<br><b>AND/OR</b><br>urgent major care changes required           | Death   |
| <b>GASTROINTESTINAL</b>            |                                    |                                                                                                                 |                                                                                                                                                                 |                                                                                                                                        |                                                                                                                                       |         |
| Feeding Intolerance                | No feeding intolerance             | Mild feeding intolerance<br><b>AND</b><br>no apparent discomfort<br><b>AND</b><br>no care change required       | Moderate feeding intolerance<br>with apparent minor discomfort<br><b>or</b> alteration of drinking<br>behaviour<br><b>AND/OR</b><br>minor care changes required | Severe feeding intolerance<br><b>AND/OR</b><br>major change in feeding support<br>required                                             | Severe feeding intolerance<br><b>AND</b><br>life-threatening consequences                                                             | Death   |
| Necrotising Enterocolitis<br>(NEC) | No gastrointestinal<br>dysfunction | <i>See note</i> <sup>†</sup>                                                                                    | <i>See note</i> <sup>†</sup>                                                                                                                                    | NEC confirmed<br><b>AND</b><br>major care change required                                                                              | NEC with<br>bowel perforation<br><b>AND/OR</b><br>life-threatening consequences<br><b>AND/OR</b><br>urgent major care change required | Death   |

<sup>†</sup>If NEC is not confirmed (Bell stages I): please record severity of individual symptoms (e.g. feeding intolerance)

| Parameter                                                 | Grade 0<br>Normal                                     | Grade 1<br>Mild                                                                                                    | Grade 2<br>Moderate                                                                                                                                                  | Grade 3<br>Severe                                                                                                                                          | Grade 4<br>Potentially Life-Threatening                                                                                                  | Grade 5 |
|-----------------------------------------------------------|-------------------------------------------------------|--------------------------------------------------------------------------------------------------------------------|----------------------------------------------------------------------------------------------------------------------------------------------------------------------|------------------------------------------------------------------------------------------------------------------------------------------------------------|------------------------------------------------------------------------------------------------------------------------------------------|---------|
| Spontaneous Intestinal Perforation                        | No evidence of intestinal perforation                 | -----                                                                                                              | -----                                                                                                                                                                | Presence of spontaneous intestinal perforation<br><b>AND</b><br>non-urgent medical stabilisation and surgical intervention indicated                       | Presence of spontaneous intestinal perforation resulting in life-threatening consequences<br><b>AND</b><br>urgent intervention indicated | Death   |
| Vomiting (infantile)                                      | No increase in vomiting from baseline                 | Increase in vomiting over baseline<br><b>AND</b><br>self-limiting                                                  | Persistent increase in vomiting over baseline with no dehydration<br><b>AND/OR</b><br>minor changes in feeding support required                                      | Persistent increase in vomiting over baseline with signs of dehydration<br><b>AND/OR</b><br>major changes in feeding support required                      | Persistent increase in vomiting with life-threatening consequences                                                                       | Death   |
| Neonatal Diarrhoea                                        | No diarrhoea                                          | Increase of 2 - 4 stools per day over baseline<br><b>OR</b><br>mild increase in ostomy output compared to baseline | Increase of 4 - 6 stools per day over baseline<br><b>OR</b><br>moderate increase in ostomy output compared to baseline                                               | Increase of ≥7 stools per day over baseline<br><b>OR</b><br>severe increase in ostomy output compared to baseline<br><b>AND/OR</b><br>signs of dehydration | Neonatal diarrhoea with life-threatening consequences                                                                                    | Death   |
| Neonatal Gastrointestinal (GI) bleeding                   | No GI bleeding                                        | Mild, self-limiting bleeding<br><b>AND</b><br>no care change required                                              | Moderate bleeding<br><b>AND/OR</b><br>minor care change required<br><b>AND/OR</b><br>change in monitoring required                                                   | Severe bleeding<br><b>AND/OR</b><br>non-life-threatening haemodynamic consequences<br><b>AND/OR</b><br>major care change required                          | GI bleeding with life-threatening consequences<br><b>AND/OR</b><br>urgent major care change required                                     | Death   |
| HEPATOBIILIARY                                            |                                                       |                                                                                                                    |                                                                                                                                                                      |                                                                                                                                                            |                                                                                                                                          |         |
| Jaundice                                                  | No jaundice                                           | Mild jaundice<br><b>AND</b><br>no treatment <b>or</b> care change required                                         | Jaundice requiring minor care change <b>AND/OR</b><br>change in monitoring                                                                                           | Jaundice requiring major care change                                                                                                                       | New onset acute bilirubin encephalopathy                                                                                                 | Death   |
| CENTRAL NERVOUS SYSTEM                                    |                                                       |                                                                                                                    |                                                                                                                                                                      |                                                                                                                                                            |                                                                                                                                          |         |
| Intraventricular Haemorrhage                              | No intraventricular haemorrhage noted or not assessed | Germinal matrix haemorrhage                                                                                        | Blood in ventricle<br><b>AND</b><br>no ventricular enlargement                                                                                                       | Blood in ventricle<br><b>AND</b><br>ventricular enlargement                                                                                                | Parenchymal haemorrhage<br><b>AND/OR</b><br>ventricular drainage required                                                                | Death   |
| Encephalopathy including Hypoxic Ischaemic Encephalopathy | No encephalopathy                                     | -----                                                                                                              | Mild, transient clinical signs (as per modified Sarnat) of encephalopathy <b>AND</b><br>increased observations required<br><b>AND/OR</b><br>additional care required | Moderate clinical signs of encephalopathy<br><b>AND/OR</b><br>meeting the criteria for therapeutic hypothermia                                             | Severe clinical signs of encephalopathy with life threatening consequences                                                               | Death   |

| Parameter                                                      | Grade 0<br>Normal                      | Grade 1<br>Mild                                                                           | Grade 2<br>Moderate                                                                                                                       | Grade 3<br>Severe                                                                                                                                                                                                    | Grade 4<br>Potentially Life-Threatening                                                                                                           | Grade 5                                            |
|----------------------------------------------------------------|----------------------------------------|-------------------------------------------------------------------------------------------|-------------------------------------------------------------------------------------------------------------------------------------------|----------------------------------------------------------------------------------------------------------------------------------------------------------------------------------------------------------------------|---------------------------------------------------------------------------------------------------------------------------------------------------|----------------------------------------------------|
| Neonatal Convulsion                                            | No convulsions                         | Single, self-limited suspected seizure<br><b>AND</b><br>no treatment required             | Suspected seizures controlled with 1 anti-seizure drug                                                                                    | Suspected seizures uncontrolled with 1 anti-seizure drug<br><b>OR</b><br>requiring 2 or more anti-seizure drugs                                                                                                      | Suspected seizures with life threatening consequences<br><b>AND/OR</b><br>suspected status epilepticus‡<br>despite multiple anti-seizure drugs    | Death related to suspected seizures                |
| ‡>30 minutes duration of convulsions within a 60-minute period |                                        |                                                                                           |                                                                                                                                           |                                                                                                                                                                                                                      |                                                                                                                                                   |                                                    |
| Periventricular leukomalacia (PVL)                             | No PVL<br><b>OR</b><br>not assessed    | Transient periventricular echo densities persisting for > 7 days and resolving completely | Transient periventricular echo densities evolving into small localised frontoparietal cysts or persistent diffuse echodensities           | Periventricular echodensities, evolving into extensive cystic periventricular lesions<br><b>OR</b><br>densities extending into the deep white matter                                                                 | -----                                                                                                                                             | -----                                              |
| Infant Irritability                                            | No irritability                        | Mild, self-limiting irritability not affecting feeding and sleeping                       | Moderate irritability<br><b>AND</b><br>minor changes in feeding and sleeping behaviour<br><b>AND/OR</b><br>minor additional care required | Severe irritability with major changes in feeding behaviour<br><b>and/or</b> requiring support other than oral feeding<br><b>AND/OR</b><br>requiring long term medical treatment                                     | Life threatening irritability with loss of autonomic control of temperature <b>or</b> heart rate<br><b>AND/OR</b><br>urgent care changes required | -----                                              |
| Retinopathy of Prematurity (ROP)                               | Normal vascularisation or not assessed | Incomplete vascularisation<br><b>AND</b><br>no care changes required                      | Pre-threshold ROP<br><b>AND/OR</b><br>more frequent ophthalmic monitoring than routine                                                    | Threshold ROP<br><b>AND/OR</b><br>major care changes required                                                                                                                                                        | Unilateral retinal detachment                                                                                                                     | Blindness<br>(bilateral retinal detachment, .....) |
| GENITOURINARY/RENAL                                            |                                        |                                                                                           |                                                                                                                                           |                                                                                                                                                                                                                      |                                                                                                                                                   |                                                    |
| Renal Dysfunction                                              | Wet nappies/diapers documented         | Evidence of mild renal dysfunction                                                        | Evidence of moderate renal dysfunction                                                                                                    | Evidence of severe renal dysfunction                                                                                                                                                                                 | Evidence of life-threatening renal dysfunction                                                                                                    | Death                                              |
| INFECTIONS/INFESTATIONS                                        |                                        |                                                                                           |                                                                                                                                           |                                                                                                                                                                                                                      |                                                                                                                                                   |                                                    |
| Sepsis<br>(Culture positive or Culture negative)               | No signs or symptoms of sepsis         | Evaluation for sepsis<br><b>AND</b><br>no anti-infectives started                         | Suspected sepsis with mild or ambiguous signs<br><b>AND/OR</b><br>anti-infectives initiated                                               | Sepsis with severe signs<br><b>AND/OR</b><br>supportive care initiated <b>or</b> escalated<br><b>AND/OR</b><br>anti-infective treatment escalated<br><b>AND</b><br>no signs of septic shock <b>and/or</b> meningitis | Sepsis with life-threatening consequences<br><b>AND</b><br>urgent major care change required                                                      | Death                                              |

| Parameter                                                                                                                     | Grade 0<br>Normal                   | Grade 1<br>Mild                                                                                                               | Grade 2<br>Moderate                                                                                                                                      | Grade 3<br>Severe                                                                                                                     | Grade 4<br>Potentially Life-Threatening                                                                                                                                              | Grade 5 |
|-------------------------------------------------------------------------------------------------------------------------------|-------------------------------------|-------------------------------------------------------------------------------------------------------------------------------|----------------------------------------------------------------------------------------------------------------------------------------------------------|---------------------------------------------------------------------------------------------------------------------------------------|--------------------------------------------------------------------------------------------------------------------------------------------------------------------------------------|---------|
| <b>BLOOD/ELECTROLYTE/METABOLIC DISORDERS/LABORATORY ABNORMALITIES</b><br>Only to be reported if deemed clinically significant |                                     |                                                                                                                               |                                                                                                                                                          |                                                                                                                                       |                                                                                                                                                                                      |         |
| Anaemia                                                                                                                       | No anaemia                          | Anaemia<br><b>AND</b><br>according to clinical judgment no additional monitoring required                                     | Anaemia with more frequent monitoring required                                                                                                           | Anaemia with no clinical signs<br><b>AND</b><br>requires blood transfusion                                                            | Anaemia with clinical signs of shock<br><b>AND</b><br>requires blood transfusion                                                                                                     | Death   |
| Electrolyte/Metabolic Disorders                                                                                               | No electrolyte/metabolic disorder   | Electrolyte/metabolic disorder<br><b>AND</b><br>according to clinical judgment no treatment or additional monitoring required | Electrolyte/metabolic disorder with no systemic signs<br><b>AND</b><br>more frequent monitoring required<br><b>AND/OR</b><br>minor care changes required | Electrolyte/metabolic disorder requiring intravenous correction                                                                       | Electrolyte/metabolic disorder with systemic signs<br><b>AND/OR</b><br>urgent invasive treatment required                                                                            | Death   |
| Leukopaenia                                                                                                                   | No leukopaenia                      | Leukopaenia<br><b>AND</b><br>according to clinical judgment no additional monitoring required                                 | Leukopaenia with more frequent monitoring required                                                                                                       | Clinically relevant leukopaenia requiring treatment<br><b>AND/OR</b><br>major care changes required                                   | Life threatening leukopaenia<br><b>AND/OR</b><br>urgent major care change required                                                                                                   | Death   |
| Neutropaenia                                                                                                                  | No neutropaenia                     | Neutropaenia<br><b>AND</b><br>according to clinical judgment no additional monitoring required                                | Neutropaenia with more frequent monitoring required                                                                                                      | Clinically relevant neutropaenia<br><b>AND/OR</b><br>GCSF treatment required<br><b>AND/OR</b><br>major care changes required          | Life-threatening neutropaenia<br><b>AND/OR</b><br>white cell transfusion required<br><b>AND/OR</b><br>urgent major care changes required                                             | Death   |
| Thrombocytopenia                                                                                                              | No thrombocytopenia                 | Thrombocytopenia<br><b>AND</b><br>according to clinical judgment no additional monitoring required                            | Thrombocytopenia with more frequent monitoring required                                                                                                  | Thrombocytopenia with non-life-threatening bleeding                                                                                   | Life-threatening thrombocytopenia with associated life-threatening bleeding<br><b>AND/OR</b><br>platelet transfusion required<br><b>AND/OR</b><br>urgent major care changes required | Death   |
| <b>OTHER</b>                                                                                                                  |                                     |                                                                                                                               |                                                                                                                                                          |                                                                                                                                       |                                                                                                                                                                                      |         |
| Administration site complication                                                                                              | No administration site complication | Painless oedema                                                                                                               | Erythema with associated symptoms                                                                                                                        | Ulceration<br><b>AND/OR</b><br>necrosis<br><b>AND/OR</b><br>severe tissue damage<br><b>AND/OR</b><br>operative intervention indicated | Life-threatening consequences<br><b>AND/OR</b><br>urgent intervention required                                                                                                       | Death   |

| Parameter                          | Grade 0<br>Normal           | Grade 1<br>Mild                                                                                                                                                                                                                                                                       | Grade 2<br>Moderate                                                                                                                                                         | Grade 3<br>Severe                                                                                                                                                                                                                            | Grade 4<br>Potentially Life-Threatening                                                                                                                                                                                          | Grade 5 |
|------------------------------------|-----------------------------|---------------------------------------------------------------------------------------------------------------------------------------------------------------------------------------------------------------------------------------------------------------------------------------|-----------------------------------------------------------------------------------------------------------------------------------------------------------------------------|----------------------------------------------------------------------------------------------------------------------------------------------------------------------------------------------------------------------------------------------|----------------------------------------------------------------------------------------------------------------------------------------------------------------------------------------------------------------------------------|---------|
| Neonatal rash                      | No rash                     | Localised rash                                                                                                                                                                                                                                                                        | Diffuse rash<br><b>AND/OR</b><br>target lesions                                                                                                                             | Diffuse rash <b>or</b> vesicles<br><b>AND/OR</b><br>limited number of bullae<br><b>AND/OR</b><br>superficial ulcerations of mucous membrane limited to one site                                                                              | Extensive <b>or</b> generalised bullous lesions<br><b>AND/OR</b><br>ulceration of mucous membranes involving ≥2 distinct mucosal sites<br><b>AND/OR</b><br>Stevens Johnson syndrome<br><b>AND/OR</b><br>toxic epidermal necrosis | Death   |
| Congenital Anomalies               | No congenital abnormalities | Minor congenital abnormality with no impairment of function                                                                                                                                                                                                                           | Minor congenital abnormality with no impairment of function<br><b>AND</b><br>future treatment may be needed                                                                 | Major congenital abnormality with impairment of function<br><b>AND</b><br>no immediate treatment needed but future treatment may be needed                                                                                                   | Major congenital abnormality with impairment of function<br><b>AND</b><br>urgent treatment needed                                                                                                                                | Death   |
| Neonatal Abstinence Syndrome (NAS) | No history of NAS           | NAS with signs<br><b>AND</b><br>no medical treatment required                                                                                                                                                                                                                         | NAS controlled with a single drug                                                                                                                                           | NAS controlled with two drugs                                                                                                                                                                                                                | NAS with seizures                                                                                                                                                                                                                | Death   |
| Any other AE                       | -----                       | Mild presentation<br><b>AND</b><br>asymptomatic <b>or</b> mild symptoms<br><b>AND</b><br>clinical <b>or</b> diagnostic observations only<br><b>AND</b><br>no change in baseline age-appropriate behaviour*<br><b>AND</b><br>no change in baseline care <b>or</b> monitoring indicated | Moderate presentation resulting in minor changes of baseline age-appropriate behaviour*<br><b>AND/OR</b><br>minor changes in baseline care <b>or</b> monitoring required*** | Severe presentation resulting in major changes of baseline age-appropriate behaviour* <b>or</b> non-life-threatening changes in basal physiological processes**<br><b>AND/OR</b><br>major change in baseline care or monitoring required**** | Life-threatening presentation resulting in life threatening changes in basal physiological processes**<br><b>AND/OR</b><br>urgent major change in baseline care required                                                         | Death   |

\*Age-appropriate behaviour refers to oral feeding behaviour, voluntary movements and activity, crying pattern, social interactions and perception of pain. \*\*Basal physiological processes refer to oxygenation, ventilation, tissue perfusion, metabolic stability organ functioning. \*\*\*Minor care changes constitute: brief, local, non-invasive or symptomatic treatments. \*\*\*\*Major care changes constitute: surgery, addition of long-term treatment, upscaling care level

BP = blood pressure; GI = gastrointestinal; Hb = haemoglobin; NEC = necrotising enterocolitis; PDA = patent ductus arteriosus; PMA = postmenstrual age; PNA = postnatal age  
PPHN = persistent pulmonary hypertension of the newborn; PVL = periventricular leukomalacia; RDS = respiratory distress syndrome; ROP = retinopathy of prematurity

**Supplementary Material 2: Example of a draft Companion Document for the Globally Relevant Neonatal Adverse Event Grading Tool**

**GLOBALLY RELEVANT NEONATAL ADVERSE EVENT GRADING TOOL COMPANION DOCUMENT**

DRAFT DOCUMENT

The investigations and interventions provided by trial sites will vary dependent on the level of care they can provide/resources/availability of specialist healthcare equipment and personnel. This document has been designed to be a companion to the Globally Relevant Neonatal Adverse Event Grading Tool adapted, with reference to the NAESS and neonatal DAIDS AE grading tools [1,2], to standardise the classification and severity of adverse events across diverse incomes settings. It can be used to provide further information on how adverse events should be graded. This document outlines some of the ways of diagnosing and managing specific neonatal conditions but it is not expected that all sites will be able to provide all diagnostic or management tools mentioned. Information is only provided where needed and so “Diagnosis” and “Management” sections are not provided for all conditions.

An adverse event (AE) can be graded on the need for a particular treatment/management option whether it is available or not e.g. Patent Ductus Arteriosus should be graded as Grade 3 if the PDA was deemed by the clinician to require treatment with indomethacin or ibuprofen whether these medications are available at their site or not.

In general, and where appropriate, the parameters refer to the associated neonatal conditions e.g., “apnoea” is “neonatal apnoea”; “Respiratory Distress Syndrome” is “Neonatal Respiratory Distress Syndrome”, etc.

**Contents**

RESPIRATORY DISORDERS..... 9

CARDIOVASCULAR DISORDERS..... 11

GASTROINTESTINAL DISORDERS..... 13

HEPATOBIILIARY DISORDERS..... 14

CENTRAL NERVOUS SYSTEM DISORDERS ..... 15

GENITOURINARY DISORDERS ..... 16

INFECTIONS/INFESTATIONS ..... 16

BLOOD/ELECTROLYTE/METABOLIC DISORDERS/LABORATORY ABNORMALITIES..... 17

OTHER DISORDERS..... 18



## RESPIRATORY DISORDERS

For conversion of oxygen administered by different modalities to  $\text{FiO}_2$ : see for example <http://nicutools.org/MediCalcs/ActualO2.php3>

### **Apnoea**

#### Diagnosis

Apnoea spell defined as apnoea event >20s or associated with bradycardia, hypoxia or cyanosis

### **Persistent pulmonary hypertension (PPHN)**

#### Diagnosis

Diagnosis of PPHN might be made solely on clinical examination and medical history. Diagnosis of PPHN might also be made following investigations (when available) and could include:

- increased estimated right ventricular pressure on echocardiography
- pre/post-ductal saturation difference of >10%

#### Management

Minor care change required (whether available or not) could include: supplemental oxygen, non-invasive ventilation

Major care change required (whether available or not) could include: need for invasive ventilation, inhaled nitric oxide (iNO), sildenafil

ECMO required – this is the need for ECMO whether it is available or not

### **Pneumothorax**

#### Diagnosis

Evidence of pneumothorax could include: radiological evidence (e.g. a small pneumothorax detected on chest X-ray performed for a different reason).

Pneumothorax might also be diagnosed on clinical examination

Evidence of a pneumothorax with life-threatening consequences could include: tension pneumothorax

#### Management

Minor care change required (whether available or not) could include: increased monitoring, supplemental oxygen

Major care change required (whether available or not) could include: need for a chest drain

## **Pulmonary haemorrhage**

### Diagnosis

Evidence of pulmonary haemorrhage could include: haemorrhagic secretion in the endotracheal tube deemed to be pulmonary in origin

### Management

Minor care changes (whether available or not) required could include: increase in positive end expiratory pressure.

Major care change (whether available or not) could include: change in ventilatory support, need for blood transfusion

## **Respiratory Distress Syndrome/Insufficiency**

### Diagnosis

Signs of respiratory distress syndrome (RDS) could include increased work of breathing, deterioration in gas exchange e.g. increase in  $p\text{CO}_2$  or decrease in oxygenation on blood gas (if available)

Mild disease, i.e. Grade 1, could include: neonate is self-ventilating in air; no significant deterioration in gas exchange (e.g. increase in  $p\text{CO}_2$  or decrease in oxygenation on blood gas (if available); radiological evidence of RDS without clinical signs

Moderate disease, i.e. Grade 2, could include: clinical evidence of increased respiratory distress with no significant change to gas exchange e.g. no significant increase in  $p\text{CO}_2$  or decrease in oxygenation on blood gas (if performed)

Severe disease, i.e. Grade 3, could include: clinical evidence of increased respiratory distress with relevant deterioration in gas exchange e.g. significant increase in  $p\text{CO}_2$  or decrease in oxygenation on blood gas (if performed)

### Management

Mild disease, i.e. Grade 1 = No supportive care required; neonate is self-ventilating in air

Minor care change required (whether available or not) could include: minor adjustments in current ventilatory support, new supplemental oxygen requirement or need for non-invasive support (e.g. CPAP/BiPAP/HHFNC)

Major care change required (whether available or not) could include: need for invasive ventilation

Urgent major care change required (whether available or not) could include: urgent intubation

## CARDIOVASCULAR DISORDERS

### **Bradycardia**

#### Diagnosis

Mild disease, i.e. Grade 1, could include brief and/or self-limiting episodes of bradycardia

For moderate, severe and life-threatening disease, i.e. Grades 2 – 4, the bradycardia should be persistent

Life-threatening consequences could include: shock

#### Management

Minor care changes required could include: change to concomitant medication, increased monitoring, treatment started, intermittent increase in oxygen requirement

Major care changes required (whether available or not) could include: escalation of Grade 2 treatment; need for new medication; need for intervention

### **Coagulation disorder**

#### Diagnosis

Biochemical **or** clinical coagulation abnormalities with life-threatening consequences could include: severe pulmonary embolism, limb ischaemia, haemorrhagic shock, disseminated intravascular coagulation (DIC)

#### Management

Intervention for coagulation disorder could include (whether available or not): correction of coagulation; blood transfusion

Urgent care changes could include (whether available or not): urgent blood transfusion

### **Congenital heart disease**

#### Diagnosis

Minor congenital heart disease = no impairment to function

Major congenital heart disease = impairment to function

#### Management

Immediate treatment (whether available or not) could include: prostaglandin infusion, urgent intubation

## **Hypertension**

### Diagnosis

Persistent hypertension with life-threatening consequences could include: malignant hypertension shock; cardiac failure; neonatal encephalopathy

### Management

Need for anti-hypertensive medication is based on the neonate requiring anti-hypertensive medication (whether this is available or not)

## **Hypotension**

### Diagnosis

Persistent hypotension with life-threatening consequences could include: shock, organ failure

### Management

Minor care change required (whether available or not) could include: additional fluids

Major care change required (whether available or not) could include: need for medication e.g. vasoactive drugs (inotropes) or hydrocortisone

## **Oedema**

### Diagnosis

Severe oedema with life-threatening consequences could include: respiratory failure, shock

### Management

Minor care changes required could include: alteration in fluid management

Major care change required (whether available or not) could include: need for diuretics

Urgent care change required (whether available or not) could include: intubation, dialysis

## **Patent ductus arteriosus**

### Management

Minor care changes required (whether available or not) could include: treatment with fluid restriction; treatment with diuretics

Major care changes required (whether available or not) could include: treatment with indomethacin, ibuprofen, paracetamol

## **Tachycardia**

### Diagnosis

Mild disease, i.e. Grade 1, could include brief and/or self-limiting episodes of tachycardia

For moderate, severe and life-threatening disease, i.e. Grades 2 – 4, the tachycardia should be persistent

Life-threatening consequences could include: shock

### Management

Minor care changes required could include: change to concomitant medication, increased monitoring

Major care changes required (whether available or not) could include: escalation of Grade 2 treatment; need for new medication; need for intervention

## **GASTROINTESTINAL DISORDERS**

### **Diarrhoea**

#### Diagnosis

Neonatal diarrhoea with life-threatening consequences could include: severe dehydration

### **Feeding intolerance**

#### Diagnosis

Mild feeding intolerance could include: increased gastric residual volume, abdominal distension

Severe feeding intolerance with life-threatening consequences could include: severe dehydration

#### Management

Minor care changes required (whether available or not) could include: feeds withheld

Major care changes required (whether available or not) could include: change to total parenteral nutrition, change to nasogastric/orogastric feeding

### **Gastrointestinal bleeding**

#### Diagnosis

Gastrointestinal bleeding with life-threatening consequences could include: haemorrhagic shock

#### Management

Major care changes required (whether available or not) could include: invasive intervention, transfusion, long term medical treatment

Urgent care change required (whether available or not) could include: urgent transfusion, urgent intubation

## **Necrotising enterocolitis**

### Diagnosis

Potentially life-threatening NEC, i.e. Grade 4, could include: NEC with shock (hypotension, bradycardia), disseminated intravascular coagulation, neutropaenia, combined respiratory and metabolic acidosis (Bell IIIA), pneumoperitoneum (Bell IIIB)

### Management

Major care changes required (whether available or not) could include: nil by mouth, antibiotic treatment, non-urgent surgery

Urgent major care changes required (whether available or not) could include: urgent surgery

## **Spontaneous intestinal perforation**

Spontaneous intestinal perforation with life-threatening consequences could include: shock, organ failure

## **Vomiting (infantile)**

### Diagnosis

Persistent increase in vomiting with life-threatening consequences could include: severe dehydration

### Management

Major changes in feeding support required may include: change to naso/orogastric feeding when not previously needed, change to TPN when not previously needed

## **HEPATOBIILIARY DISORDERS**

### **Jaundice**

#### Management

Moderate disease, i.e. Grade 2, could include jaundice requiring phototherapy and/or intravenous immunoglobulin, supportive treatment e.g. fat soluble vitamins, ursodeoxycholic acid

Severe disease requiring major care change, i.e. Grade 3, could include jaundice requiring exchange transfusion (whether available or not)

## CENTRAL NERVOUS SYSTEM DISORDERS

### Encephalopathy

#### Diagnosis

Meeting criteria for therapeutic hypothermia = Meeting criteria for therapeutic hypothermia whether this is offered or not

#### Management

Life-threatening consequences could include: respiratory depression, refractory seizures

### Intraventricular haemorrhage

#### Diagnosis

Life-threatening disease, i.e. Grade 4, could include: parenchymal haemorrhage

#### Management

Management of life-threatening disease, i.e. Grade 4, could include (whether available or not): ventricular drainage

### Convulsions

#### Diagnosis

Suspected seizures with life-threatening consequences could include: respiratory depression, need for ventilation, refractory seizures

Status epilepticus = >30 minute duration of convulsions within any 60-minute period

### Irritability

#### Management

Minor additional care required could include: occasional analgesics

Long-term medical treatment could include: sedatives

### Retinopathy of prematurity

#### Diagnosis

Blindness/bilateral retinal detachment should be graded as Grade 5

#### Management

Major care changes could include: any treatment for ROP such as laser intervention, intravitreal anti-VEGF, operative management

## GENITOURINARY DISORDERS

### Renal dysfunction

#### Diagnosis

For categorisation of renal dysfunction refer to the below Neonatal KDIGO table [3]

- Mild renal dysfunction could include: KDIGO Stage 0 AKI
- Moderate renal dysfunction could include: KDIGO Stage 1 AKI
- Severe renal dysfunction could include: KDIGO Stage 2 AKI
- Life-threatening renal dysfunction could include: KDIGO Stage 3 AKI

**Neonatal KDIGO** – can be staged on either serum creatinine **AND/OR** urine output

| AKI stage | Serum creatinine                                                                                       | Urine output (hourly)                                              | Grading                    |
|-----------|--------------------------------------------------------------------------------------------------------|--------------------------------------------------------------------|----------------------------|
| 0         | No change in SCr<br><b>OR</b><br>SCr rise <0.3 mg/dL                                                   | ≥0.5 ml/kg/hour                                                    | Mild – Grade 1             |
| 1         | SCr rise of ≥0.3 mg/dL within 48 hours<br><b>OR</b><br>SCr rise ≥ 1.5 – 1.9 x baseline SCr*            | <0.5 ml/kg/hour x 6 – 12hours                                      | Moderate – Grade 2         |
| 2         | SCr rise ≥2.0 – 2.9 x baseline SCr                                                                     | < 0.5 ml/kg/hour >12 hours                                         | Severe – Grade 3           |
| 3         | SCr rise ≥3 x baseline<br><b>OR</b><br>≥2.5 mg/dL**<br><b>OR</b><br>kidney support therapy utilisation | <0.3 ml/kg/hour for ≥24 hours<br><b>OR</b><br>anuria for ≥12 hours | Life-threatening – Grade 4 |

mg/dL – milligrams per decilitre; CR = serum creatinine; \*Baseline SCr defined as lowest previous SCr value;

\*\*SCr value of 2.5 mg/dL represents glomerular filtration rate of <10 mL/min/1.73 m<sup>2</sup>

*Adapted from Kidney Disease: Improving Global Outcomes (KDIGO Acute Kidney Injury Workgroup. KDIGO clinical practice guideline for acute kidney injury. Kidney Int Suppl 2012;2:1–138*

## INFECTIONS/INFESTATIONS

### Sepsis

#### Diagnosis

Severe signs of sepsis could include: fever, grunting, **no** signs of septic shock or meningitis

Sepsis with life-threatening consequences could include: shock, disseminated intravascular coagulation



## **BLOOD/ELECTROLYTE/METABOLIC DISORDERS/LABORATORY ABNORMALITIES**

### **Anaemia**

#### Diagnosis & Management

Mild disease, i.e. Grade 1, is the presence of anaemia and where according to clinical judgement no additional monitoring is deemed necessary. Haemoglobin, if performed, might, in general, be in the range of 8 – 10 g/dL with no need for a blood transfusion and no additional monitoring as per the clinician's judgement

Moderate disease, i.e. Grade 2, is the presence of anaemia but where according to clinical judgement more frequent monitoring is deemed necessary but blood transfusion is not needed. Haemoglobin, if performed, might in general be  $\leq 8$  g/dL with additional monitoring but no need for a blood transfusion as per the clinician's judgement

Severe disease, i.e. Grade 3, is the presence of anaemia without any clinical signs that according to clinical judgement requires a blood transfusion, whether available or not

### **Electrolyte/Metabolic Disorders**

#### Management

Mild disease, i.e. Grade 1, is the presence of an electrolyte/metabolic disorder but where according to clinical judgement no treatment or additional monitoring are deemed necessary.

Moderate disease, i.e. Grade 2, is the presence of an electrolyte/metabolic disorder with no systemic signs and where according to clinical judgement more frequent monitoring or minor care changes are deemed necessary. More frequent monitoring required could include: repeating blood tests for electrolyte levels more often than usual care. Minor care changes could include (whether available or not): oral/nasogastric/orogastric electrolyte correction

Severe disease, i.e. Grade 3, is the presence of an electrolyte/metabolic disorder requiring intravenous electrolyte correction, whether available or not

### **Leukopaenia**

#### Diagnosis & Management

Mild disease, i.e. Grade 1, is the presence of leukopaenia and where according to clinical judgement no additional monitoring is deemed necessary.

Moderate disease, i.e. Grade 2, is the presence of leukopaenia but where according to clinical judgement more frequent monitoring is deemed necessary

Severe disease, i.e. Grade 3, is the presence of clinically-relevant leukopaenia requiring treatment, whether available or not and/or major care changes are required

Life-threatening leukopaenia, i.e. Grade 4, is the presence of life-threatening leukopaenia requiring urgent major care changes and/or treatment. Life-threatening leukopaenia could include: leukopaenia with secondary life-threatening sepsis

## **Neutropaenia**

### Diagnosis & Management

Mild disease, i.e. Grade 1, is the presence of neutropaenia and where according to clinical judgement no additional monitoring is deemed necessary. Absolute neutrophil count (ANC), if performed, might, in general be  $<1000/\text{mm}^3$

Moderate disease, i.e. Grade 2, is the presence of neutropaenia but where according to clinical judgement more frequent monitoring is deemed necessary. ANC, if performed, might, in general, be  $<500/\text{mm}^3$

Severe disease, i.e. Grade 3, is clinically relevant neutropaenia where a major care change is required and/or GCSF treatment is deemed necessary, whether available or not

Life-threatening disease, i.e. Grade 4, is the presence of life-threatening neutropaenia requiring urgent major care changes and/or white cell transfusion, whether available or not. Life-threatening neutropaenia could include: neutropaenia with secondary life-threatening sepsis

## **Thrombocytopaenia**

### Diagnosis & Management

Mild disease, i.e. Grade 1, is the presence of thrombocytopaenia and where according to clinical judgement no additional monitoring is deemed necessary. Platelet count, if performed, might, in general, be in the range of  $75 - 100 \times 10^9/\text{L}$  with no need for a platelet transfusion and no additional monitoring as per the clinician's judgement

Moderate disease, i.e. Grade 2, is the presence of thrombocytopaenia but where according to clinical judgement more frequent monitoring is deemed necessary but platelet transfusion is not needed. Platelet count, if performed, might, in general, be in the range of  $50 < 75 \times 10^9/\text{L}$  with additional monitoring but no need for a platelet transfusion as per the clinician's judgement

Severe disease, i.e. Grade 3, is the presence of thrombocytopaenia with non-life threatening bleeding that according to clinical judgement does not require a platelet transfusion. Platelet count, if performed, might, in general, be in the range of  $25 < 50 \times 10^9/\text{L}$  without life-threatening bleeding.

Life-threatening disease, i.e. Grade 4, is the presence of life-threatening thrombocytopaenia with associated life-threatening bleeding and/or where according to clinical judgement a platelet transfusion is deemed necessary and/or major care changes are required. Platelet count, if performed, might in general, be  $<25 \times 10^9/\text{L}$

## **OTHER DISORDERS**

### **Administration site complication**

Associated symptoms could include: oedema, pain, induration, phlebitis

## REFERENCES

1. IMPAACT: Pharmacokinetic characteristics of antiretrovirals and tuberculosis medicine in low birth weight infants protocol [Internet]. 2018 [cited 2024 Oct 13]. Available from: <https://www.impaactnetwork.org/studies/p1106>
2. Salaets T, Turner MA, Short M, Ward RM, Hokuto I, Ariagno RL, et al. Development of a neonatal adverse event severity scale through a Delphi consensus approach. *Arch Dis Child*. 2019;104:1167–73.
3. Selewski DT, Charlton JR, Jetton JG, Guillet R, Mhanna MJ, Askenazi DJ, et al. Neonatal Acute Kidney Injury. *Pediatrics*. 2015;136:e463–73.
